# Supplementary material for: Sodium titanate nanowires as a stable and easily handled precursor for the shape controlled synthesis of TiO2and their photocatalytic performance
Source: Royal Society of Chemistry journal article supplement (doi:10.1039/c3ce41688g), 2013-10-22

## Supporting materials

Figure S1 EDS spectra of the prepared STNWs and TiO<sub>2</sub> samples

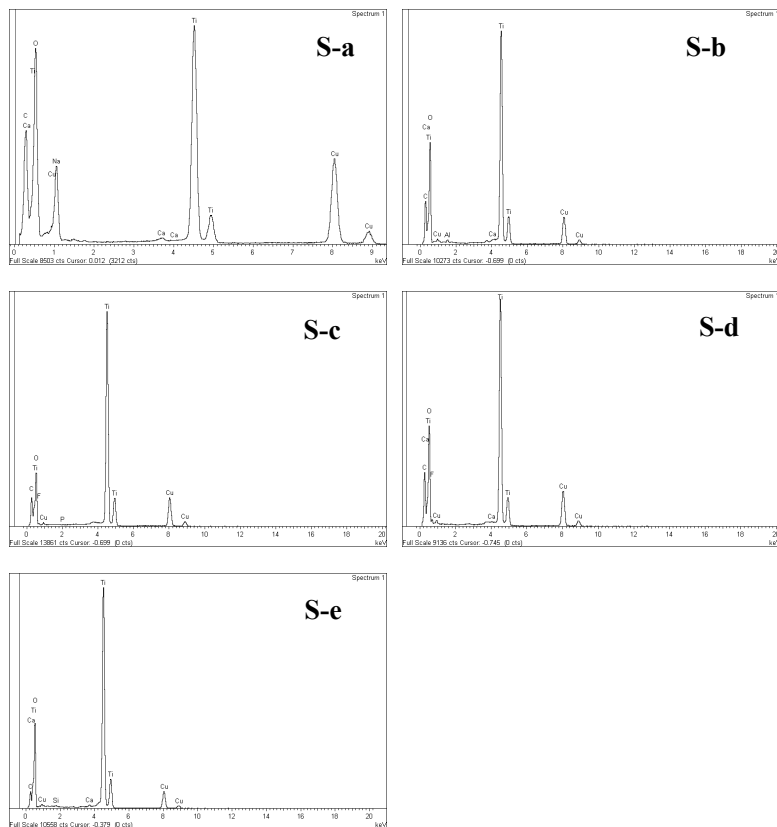

**Figure S2** The photographs of the reaction suspensions after gravity sedimentation for (a) 30 and (b) 60 min, respectively. The suspensions were taken immediately from the reaction solutions after the photocatalytic tests were accomplished.

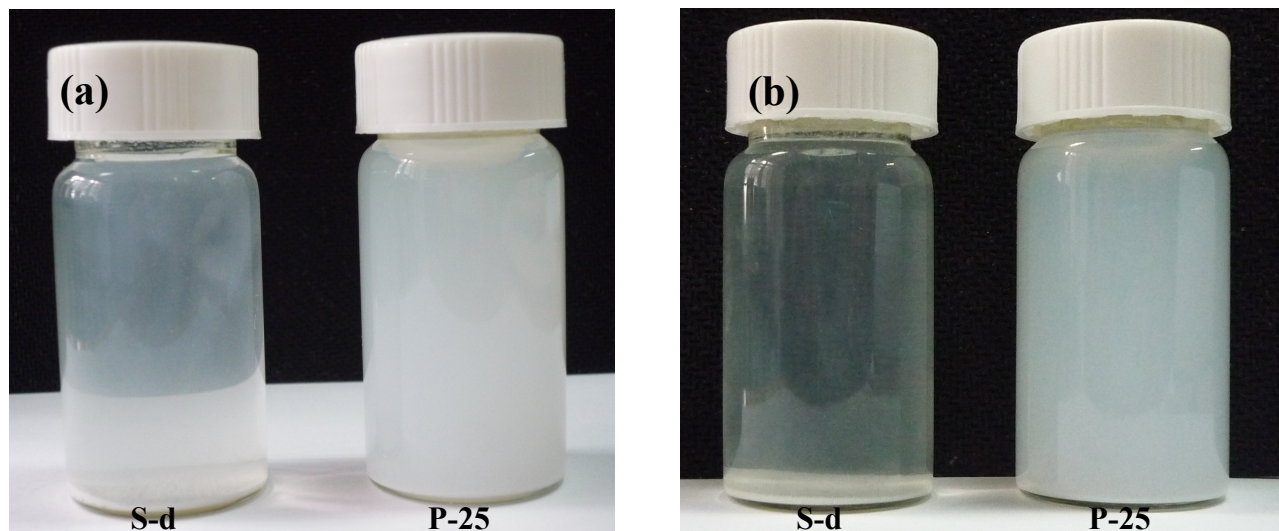

Supplement: c3ce41688g.pdf [file c3ce41688g.pdf]
